# Supplementary material for: Combined assimilation of streamflow and snow water equivalent for mid-term ensemble streamflow forecasts in snow-dominated regions
Source: Copernicus journal article supplement (doi:10.5194/hess-2016-166), 2016-04-26
Supplement: Supplementary file [file hess-2016-166-AC4-supplement.pdf]

**Table 1: Overview of multivariate DA scenarios.**

| Method | Streamflow DA updates: |      | SWE DA updates: |      |
|--------|------------------------|------|-----------------|------|
|        | VOL + GWL?             | SWE? | VOL + GWL?      | SWE? |
| VG-S   | yes                    | no   | no              | yes  |
| VG2-S  | yes                    | no   | yes             | yes  |
| VG-S2  | yes                    | yes  | no              | yes  |
| VG2-S2 | yes                    | yes  | yes             | yes  |
